# Supplementary material
Source: PubMed Central journal article supplement (PMC8432303)

**Figure S1. Representative Ponceau Stain.**

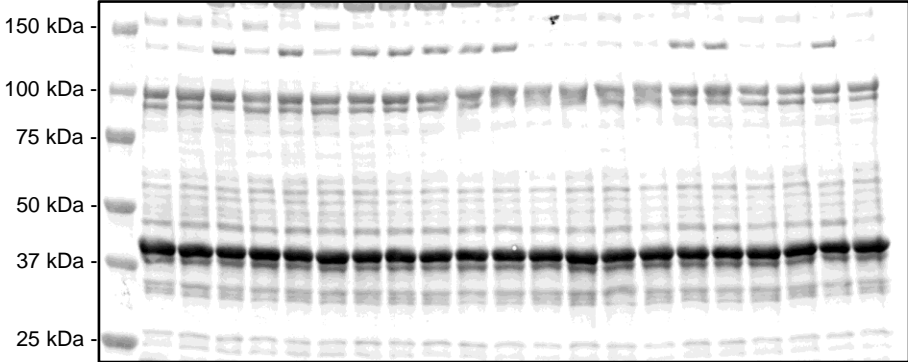

Supplement: NIHMS1710944-supplement-Figure_S1.pdf [file NIHMS1710944-supplement-Figure_S1.pdf]

**Figure S3.**

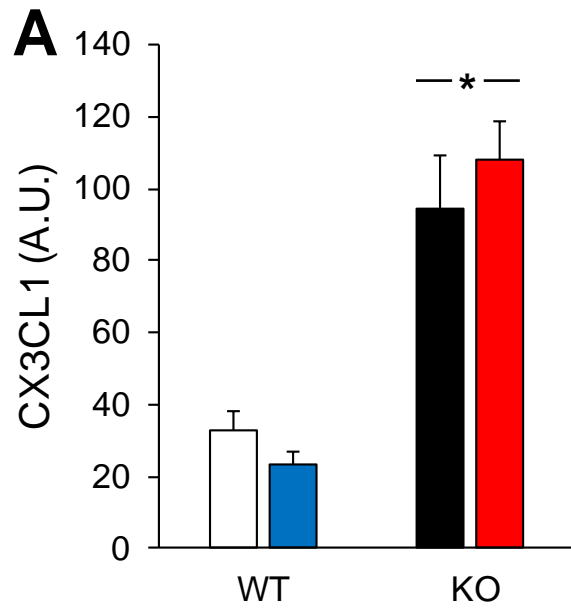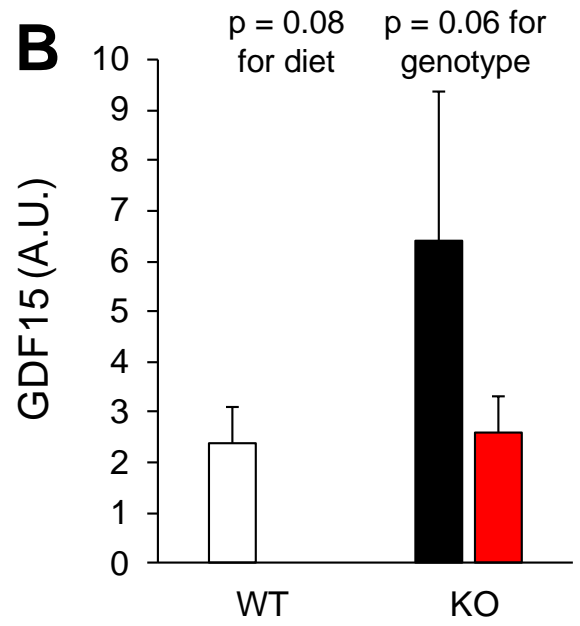

Supplement: NIHMS1710944-supplement-Figure_S3.pdf [file NIHMS1710944-supplement-Figure_S3.pdf]
